# Supplementary material for: Rapid comparative evaluation of SARS-CoV-2 rapid point-of-care antigen tests
Source: bioRxiv or medRxiv preprint supplement (doi:10.1101/2021.07.29.21261314), 2021-09-09
Supplement: Supplementary file [file media-6.pdf]

**Supplemental Table S6: Estimation of SARS-CoV2 genome copy numbers for Ct test samples.** Concentrations of the samples in SARS-CoV-2 genome copies per ml were calculated using internal data supplied by TIB MolBiol for the LightMix® Modular Sarbecovirus SARS-CoV-2 Kit, estimating 1000 viral genome copies per reaction at Ct30 and extrapolating therefrom. Numbers were corrected for the volume used in RT-qPCR (10µl) and the input/ eluate ratio of the RNA extraction process, and are given in logarithmic units base 10.

| Ct test sample | Copies per ml (corrected for extraction and RT-qPCR reaction volume) | log10 [SARS-CoV-2 genome copies/ ml] |
|----------------|----------------------------------------------------------------------|--------------------------------------|
| 16             | 702 171 428                                                          | 8,9                                  |
| 21             | 21 942 857                                                           | 7,3                                  |
| 25             | 1 371 428                                                            | 6,1                                  |
| 28             | 171 428                                                              | 5,2                                  |
| Reference: 30  | 42 857                                                               | 4,6                                  |
